# Supplementary material
Source: PubMed Central journal article supplement (PMC2980814)
Supplement: bbe0076-0032-s01.pdf [file bbe0076-0032-s01.pdf]

**Supplementary Table 1:**

**Deviations from expected cellular composition of the brain**

| Whole brain                | Number of neurons expected for brain mass,<br>$N_{br}=109239790.169 \times M_{br}^{0.923}$ |                      |            | Number of non-neurons expected for brain<br>mass, $NN_{br}=69199591.082 \times M_{br}^{1.011}$ |                      |            |
|----------------------------|--------------------------------------------------------------------------------------------|----------------------|------------|------------------------------------------------------------------------------------------------|----------------------|------------|
|                            | Expected                                                                                   | Observed             | Deviation* | Expected                                                                                       | Observed             | Deviation* |
| <i>Microcebus murinus</i>  | $310.50 \times 10^6$                                                                       | $393.66 \times 10^6$ | 26.8%      | $125.37 \times 10^6$                                                                           | $138.95 \times 10^6$ | 10.8%      |
| <i>Callimico goeldii</i>   | n.a.                                                                                       | n.a.                 | n.a.       | n.a.                                                                                           | n.a.                 | n.a.       |
| <i>Macaca fascicularis</i> | $7.14 \times 10^9$                                                                         | $6.59 \times 10^9$   | -8.2%      | $3.33 \times 10^9$                                                                             | $3.15 \times 10^9$   | -5.4%      |
| <i>Macaca radiata</i>      | $9.41 \times 10^9$                                                                         | $8.63 \times 10^9$   | -7.6%      | $4.45 \times 10^9$                                                                             | $4.88 \times 10^9$   | 9.6%       |
| <i>Papio cynocephalus</i>  | $22.43 \times 10^9$                                                                        | $20.12 \times 10^9$  | -10.3%     | $11.06 \times 10^9$                                                                            | $9.18 \times 10^9$   | -17.0%     |
| <i>Callithrix jacchus</i>  | $1.28 \times 10^9$                                                                         | $1.23 \times 10^9$   | -3.9%      | $550.66 \times 10^6$                                                                           | $590.74 \times 10^6$ | 7.3%       |
| <i>Otolemur garnettii</i>  | $1.65 \times 10^9$                                                                         | $1.60 \times 10^9$   | -2.9%      | $720.51 \times 10^6$                                                                           | $666.59 \times 10^6$ | -7.5%      |
| <i>Aotus trivirgatus</i>   | $2.52 \times 10^9$                                                                         | $2.66 \times 10^9$   | 5.7%       | $1.12 \times 10^9$                                                                             | $1.20 \times 10^9$   | 6.5%       |
| <i>Saimiri sciureus</i>    | $4.74 \times 10^9$                                                                         | $5.32 \times 10^9$   | 12.3%      | $2.17 \times 10^9$                                                                             | $2.07 \times 10^9$   | -4.5%      |
| <i>Cebus apella</i>        | $8.03 \times 10^9$                                                                         | $6.99 \times 10^9$   | -13.0%     | $3.77 \times 10^9$                                                                             | $3.30 \times 10^9$   | -12.6%     |
| <i>Macaca mulatta</i>      | $13.20 \times 10^9$                                                                        | $13.54 \times 10^9$  | 2.5%       | $6.35 \times 10^9$                                                                             | $7.16 \times 10^9$   | 12.8%      |
|                            |                                                                                            |                      |            |                                                                                                |                      |            |

**Supplementary Table 1:**

**Deviations from expected cellular composition of the brain**

| Cerebral cortex            | Number of neurons expected for cortical mass,<br>$N_{cx}=61684412.324 \times M_{cx}^{0.828}$ |                      |            | Number of non-neurons expected for cortical mass,<br>$NN_{cx}=63504874.736 \times M_{cx}^{1.033}$ |                      |            |
|----------------------------|----------------------------------------------------------------------------------------------|----------------------|------------|---------------------------------------------------------------------------------------------------|----------------------|------------|
|                            | Expected                                                                                     | Observed             | Deviation* | Expected                                                                                          | Observed             | Deviation* |
| <i>Microcebus murinus</i>  | $56.95 \times 10^6$                                                                          | $22.31 \times 10^6$  | -60.8%     | $57.48 \times 10^6$                                                                               | $70.65 \times 10^6$  | 22.9%      |
| <i>Callimico goeldii</i>   | $515.32 \times 10^6$                                                                         | $357.13 \times 10^6$ | -30.7%     | $897.34 \times 10^6$                                                                              | $715.33 \times 10^6$ | -20.3%     |
| <i>Macaca fascicularis</i> | $1.20 \times 10^9$                                                                           | $800.96 \times 10^6$ | -33.5%     | $2.59 \times 10^9$                                                                                | $2.76 \times 10^9$   | 6.5%       |
| <i>Macaca radiata</i>      | $1.53 \times 10^9$                                                                           | $1.66 \times 10^9$   | 8.3%       | $3.48 \times 10^9$                                                                                | $3.81 \times 10^9$   | 9.3%       |
| <i>Papio cynocephalus</i>  | $3.25 \times 10^9$                                                                           | $2.88 \times 10^9$   | -11.6%     | $8.94 \times 10^9$                                                                                | $7.57 \times 10^9$   | -15.3%     |
| <i>Callithrix jacchus</i>  | $255.36 \times 10^6$                                                                         | $244.72 \times 10^6$ | -4.2%      | $373.72 \times 10^6$                                                                              | $395.34 \times 10^6$ | 5.8%       |
| <i>Otolemur garnettii</i>  | $282.79 \times 10^6$                                                                         | $226.09 \times 10^6$ | -20.0%     | $424.44 \times 10^6$                                                                              | $402.07 \times 10^6$ | -5.3%      |
| <i>Aotus trivirgatus</i>   | $436.22 \times 10^6$                                                                         | $441.90 \times 10^6$ | 1.3%       | $728.90 \times 10^6$                                                                              | $695.42 \times 10^6$ | -4.6%      |
| <i>Saimiri sciureus</i>    | $756.77 \times 10^6$                                                                         | $1.34 \times 10^9$   | 77.1%      | $1.45 \times 10^9$                                                                                | $1.61 \times 10^9$   | 11.1%      |
| <i>Cebus apella</i>        | $1.28 \times 10^9$                                                                           | $1.14 \times 10^9$   | -11.3%     | $2.81 \times 10^9$                                                                                | $2.55 \times 10^9$   | -9.2%      |
| <i>Macaca mulatta</i>      | $2.24 \times 10^9$                                                                           | $1.71 \times 10^9$   | -17.6%     | $5.10 \times 10^9$                                                                                | $5.27 \times 10^9$   | 3.3%       |

Supplementary Table 1:

Deviations from expected cellular composition of the brain

| Cerebellum                 | Number of neurons expected for cerebellar mass, $N_{cb}=548551147.038 \times M_{cb}^{0.984}$ |                      |            | Number of non-neurons expected for cerebellar mass, $NN_{cb}=60983508.232 \times M_{cb}^{1.036}$ |                      |            |
|----------------------------|----------------------------------------------------------------------------------------------|----------------------|------------|--------------------------------------------------------------------------------------------------|----------------------|------------|
|                            | Expected                                                                                     | Observed             | Deviation* | Expected                                                                                         | Observed             | Deviation* |
| <i>Microcebus murinus</i>  | $217.73 \times 10^6$                                                                         | $221.39 \times 10^6$ | 1.7%       | $23.05 \times 10^6$                                                                              | $17.43 \times 10^6$  | -22.4%     |
| <i>Callimico goeldii</i>   | n.a.                                                                                         | n.a.                 | n.a.       | n.a.                                                                                             | n.a.                 | n.a.       |
| <i>Macaca fascicularis</i> | $3.01 \times 10^9$                                                                           | $2.57 \times 10^9$   | -14.5%     | $366.18 \times 10^6$                                                                             | $135.40 \times 10^6$ | -63.0%     |
| <i>Macaca radiata</i>      | $3.07 \times 10^9$                                                                           | $2.04 \times 10^9$   | -33.5%     | $373.31 \times 10^6$                                                                             | $453.56 \times 10^9$ | 21.5%      |
| <i>Papio cynocephalus</i>  | $7.23 \times 10^9$                                                                           | $7.79 \times 10^9$   | 7.8%       | $921.15 \times 10^6$                                                                             | $525.98 \times 10^6$ | -42.9%     |
| <i>Callithrix jacchus</i>  | $402.46 \times 10^6$                                                                         | $361.37 \times 10^6$ | -10.2%     | $44.02 \times 10^6$                                                                              | $45.36 \times 10^6$  | 21.5%      |
| <i>Otolemur garnettii</i>  | $654.19 \times 10^6$                                                                         | $743.50 \times 10^6$ | 13.7%      | $73.41 \times 10^6$                                                                              | $65.96 \times 10^6$  | -10.1%     |
| <i>Aotus trivirgatus</i>   | $941.78 \times 10^6$                                                                         | $1.04 \times 10^9$   | 10.4%      | $107.73 \times 10^6$                                                                             | $145.27 \times 10^6$ | 34.8%      |
| <i>Saimiri sciureus</i>    | $2.30 \times 10^9$                                                                           | $1.82 \times 10^9$   | -21.0%     | $276.37 \times 10^6$                                                                             | $133.02 \times 10^6$ | -51.9%     |
| <i>Cebus apella</i>        | $2.46 \times 10^9$                                                                           | $2.49 \times 10^9$   | 1.1%       | $296.37 \times 10^6$                                                                             | $245.81 \times 10^6$ | -17.1%     |
| <i>Macaca mulatta</i>      | $4.08 \times 10^9$                                                                           | $4.55 \times 10^9$   | 11.4%      | $504.97 \times 10^6$                                                                             | $931.03 \times 10^6$ | 84.4%      |

### Supplementary Table 1:

#### Deviations from expected cellular composition of the brain

| Remaining areas            | Number of neurons expected for remaining areas mass, $N_{ra}=17916389.377 \times M_{ra}^{0.742}$ |                      |            | Number of non-neurons expected for remaining areas mass, $NN_{ra}=89200864.467 \times M_{ra}^{1.036}$ |                      |            |
|----------------------------|--------------------------------------------------------------------------------------------------|----------------------|------------|-------------------------------------------------------------------------------------------------------|----------------------|------------|
|                            | Expected                                                                                         | Observed             | Deviation* | Expected                                                                                              | Observed             | Deviation* |
| <i>Microcebus murinus</i>  | $10.71 \times 10^6$                                                                              | $11.01 \times 10^6$  | 2.8%       | $47.14 \times 10^6$                                                                                   | $50.86 \times 10^6$  | 7.9%       |
| <i>Callimico goeldii</i>   | $30.92 \times 10^6$                                                                              | $53.91 \times 10^6$  | 74.4%      | $175.44 \times 10^6$                                                                                  | $194.53 \times 10^6$ | 10.9%      |
| <i>Macaca fascicularis</i> | $52.82 \times 10^6$                                                                              | $65.45 \times 10^6$  | 23.9%      | $340.88 \times 10^6$                                                                                  | $260.17 \times 10^6$ | -23.7%     |
| <i>Macaca radiata</i>      | $79.49 \times 10^6$                                                                              | $61.36 \times 10^9$  | -22.8%     | $565.78 \times 10^6$                                                                                  | $616.64 \times 10^6$ | 9.0%       |
| <i>Papio cynocephalus</i>  | $148.14 \times 10^6$                                                                             | $278.15 \times 10^6$ | 87.8%      | $1.22 \times 10^9$                                                                                    | $1.08 \times 10^9$   | -11.8%     |
| <i>Callithrix jacchus</i>  | $24.07 \times 10^6$                                                                              | $29.72 \times 10^6$  | 23.5%      | $128.66 \times 10^6$                                                                                  | $145.91 \times 10^6$ | 13.4%      |
| <i>Otolemur garnettii</i>  | $31.41 \times 10^6$                                                                              | $20.80 \times 10^6$  | -33.8%     | $178.92 \times 10^6$                                                                                  | $147.44 \times 10^6$ | -17.6%     |
| <i>Aotus trivirgatus</i>   | $41.52 \times 10^6$                                                                              | $49.34 \times 10^6$  | 18.8%      | $252.89 \times 10^6$                                                                                  | $313.46 \times 10^6$ | 23.9%      |
| <i>Saimiri sciureus</i>    | $59.18 \times 10^6$                                                                              | $65.53 \times 10^6$  | 10.7%      | $392.41 \times 10^6$                                                                                  | $302.59 \times 10^6$ | -22.9%     |
| <i>Cebus apella</i>        | $87.14 \times 10^6$                                                                              | $61.85 \times 10^6$  | -29.0%     | $634.06 \times 10^6$                                                                                  | $506.11 \times 10^6$ | -20.2%     |
| <i>Macaca mulatta</i>      | $93.01 \times 10^6$                                                                              | $101.90 \times 10^6$ | 12.0%      | $687.43 \times 10^6$                                                                                  | $966.52 \times 10^6$ | 40.6%      |

\*Deviation =  $100 \times (\text{Observed} - \text{Expected}) / \text{Expected}$
